# Supplementary material for: Multiobjective Genetic Programming Can Improve the Explanatory Capabilities of Mechanism-Based Models of Social Systems
Source: Hindawi journal article supplement (doi:10.1155/2020/8923197), 2020-06-05
Supplement: f1 [file 8923197.f1.zip]

Archive with 2 entries (2 files):
- 8923197.f1/supplementary material A - FINAL.docx
- 8923197.f1/supplementary material B - FINAL.docx
