# Supplementary material for: Multiobjective Genetic Programming Can Improve the Explanatory Capabilities of Mechanism-Based Models of Social Systems
Source: Hindawi journal article supplement (doi:10.1155/2020/8923197), 2020-06-05
Supplement: f1 [file 8923197.f1.zip › 8923197.f1/supplementary material A - FINAL.docx]

**Supplementary material A – The evolution of the grammar**

This supplementary material provides the documentation of the evolution of the grammar over three iterations of the structural calibration process.

**Iteration 1**

<p> ::= RoleLoad=<e1>; RoleIncongruence=<e2>; RoleStrain=<e3>; OutMod=<e4>; InMod=<e4>; probFirstDrink=<e5>; probNextDrink=<e5>;

# Variables

<v0> ::= MaritalStatus | ParentStatus | EmploymentStatus

<v1> ::= InvolvedxMarital | InvolvedxParent | InvolvedxEmployment

<v2> ::= DiffExpectancyMarital | DiffExpectancyParent | DiffExpectancyEmployment

<v3> ::= RoleLoad | RoleIncongruence

<v4> ::= RoleStrain | ProbOppIn | ProbOppOut | Disposition | RoleLoad | RoleIncongruence

# Role load

<e1> ::= (<e1>+<e1>) | (<e1>-<e1>) | (<e1>*<e1>) | <v0> | <v1> | <c>

# Role incongruence

<e2> ::= (<e2>+<e2>)| (<e2>-<e2>) | (<e2>*<e2>) | <v0> | <v2> | <c>

# Role strain

<e3> ::= (<e3>+<e3>)| (<e3>-<e3>) | (<e3>*<e3>) | <v0> | <v3> | <c>

# Modifiers for logOddsOppOut/In

<e4> ::= (<e4>+<e4>)| (<e4>-<e4>) | (<e4>*<e4>) | <v0> | RoleLoad | <c>

# Daily drinking probability (first and next drink)

<e5> ::= (<e5>+<e5>)| (<e5>-<e5>) | (<e5>*<e5>) | <v0> | <v4> | <c>

# Constants and calibrated parameters

<c> ::= 0 | 1 | 2 | 3 | 4 | 5 | 6 | 7 | 8 | 9 |

        0.1 | 0.2 | 0.3 | 0.4 | 0.5 | 0.6 | 0.7 | 0.8 | 0.9 |

        10 | 100 | 0.01 | 0.001 | 0.333 | 0.25 |

        0.179 | 0.038 | 0.128 | 60.952 |

        0.253 | 11.187 | 23.786 | 2.010 |

        1.104 | 9.100

**Iteration 2**

Change log:

- Expose all mechanisms in role model by adding on/off toggle for role selection and socialization mechanisms.
- Limit drinking probability to use certain intermediate theory-related variables by removing demographic variables <v0> and intermediate variables RoleLoad | RoleIncongruence from <e4>.
- Do not allow constants to be by themselves in expressions. However, constants can be used in an expression with multiplication, plus, minus operators: replacing <c> with (<c>*<e?>) | (<c>+<e?>) | (<c>-<e?>) | (<e?>-<c>) in all <e?>.
- Allow constant to be constructed by other constants by adding three more terms (<c>+<c>) | (<c>-<c>) | (<c>*<c>) into the constant <c>.

<p> ::= RoleSelectionMech=<e0>; RoleSocialisationMech=<e0>; RoleLoad=<e1>; RoleIncongruence=<e2>; RoleStrain=<e3>; OutMod=<e4>; InMod=<e4>; probFirstDrink=<e5>; probNextDrink=<e5>;

# Variables

<v0> ::= MaritalStatus | ParentStatus | EmploymentStatus

<v1> ::= InvolvedxMarital | InvolvedxParent | InvolvedxEmployment

<v2> ::= DiffExpectancyMarital | DiffExpectancyParent | DiffExpectancyEmployment

<v3> ::= RoleLoad | RoleIncongruence

<v4> ::= RoleStrain | ProbOppIn | ProbOppOut | Disposition

# Toggle for mechanisms

<e0> ::= ON | OFF

# Role load

<e1> ::= (<e1>+<e1>) | (<e1>-<e1>) | (<e1>*<e1>) | (<c>*<e1>) | (<c>+<e1>) | (<c>-<e1>) | (<e1>-<c>) | <v0> | <v1>

# Role incongruence

<e2> ::= (<e2>+<e2>) | (<e2>-<e2>) | (<e2>*<e2>) | (<c>*<e2>) | (<c>+<e2>) | (<c>-<e2>) | (<e2>-<c>) | <v0> | <v2>

# Role strain

<e3> ::= (<e3>+<e3>) | (<e3>-<e3>) | (<e3>*<e3>) | (<c>*<e3>) | (<c>+<e3>) | (<c>-<e3>) | (<e3>-<c>) | <v3>

# Modifiers for logOddsOppOut/In

<e4> ::= (<e4>+<e4>) | (<e4>-<e4>) | (<e4>*<e4>) | (<c>*<e4>) | (<c>+<e4>) | (<c>-<e4>) | (<e4>-<c>) | <v0> | <v3>

# Daily drinking probability (first and next drink)

<e5> ::= (<e5>+<e5>) | (<e5>-<e5>) | (<e5>*<e5>) | (<c>*<e5>) | (<c>+<e5>) | (<c>-<e5>) | (<e5>-<c>) | <v4>

# Constants

<c> ::= 0 | 1 | 2 | 3 | 4 | 5 | 6 | 7 | 8 | 9 |

        0.1 | 0.2 | 0.3 | 0.4 | 0.5 | 0.6 | 0.7 | 0.8 | 0.9 |

        10 | 100 | 0.01 | 0.001 | 0.333 | 0.25 |

        0.179 | 0.038 | 0.128 | 60.952 |

        0.253 | 11.187 | 23.786 | 2.010 |

        1.104 | 9.100 |

        (<c>+<c>) | (<c>-<c>) | (<c>*<c>)

**Iteration 3**

The iteration 3 is available in the main manuscript.

Change log:

- Disallow constant <c> to be constructed from other constants by removing (<c>+<c>) | (<c>-<c>) | (<c>*<c>) from <c>.
- Restrict the use of demographic variables <v0> in role incongruence <e2> by replacing <v0> with (<v0>*<e2>) | ((1-<v0>)*<e2>) in <v0>.
- Restrict modifiers of log odds opportunity <e4> to use only role load and not role incongruence: replacing <v4> with RoleLoad in <e4>.
