# Supplementary material for: Multiobjective Genetic Programming Can Improve the Explanatory Capabilities of Mechanism-Based Models of Social Systems
Source: Hindawi journal article supplement (doi:10.1155/2020/8923197), 2020-06-05
Supplement: f1 [file 8923197.f1.zip › 8923197.f1/supplementary material B - FINAL.docx]

**Supplementary material B – The structures on the Pareto front and corresponding theoretical credibility**

This supplementary material provides the non-dominated model structures generated by the GGP process on the Pareto front along with the corresponding theoretical credibility classifications by the expert. Through analysis of the deliberative discussions held between the expert, analyst, and modeler, three qualitative criteria that enable a consistent assessment of credibility for this example case study were generated:

1. At least one of the theory constructs must be implicated in the model dynamics;
2. The theory constructs must be used to represent mechanisms, rather than being proxies for black-box variable-centric explanation;
3. The model equations that describe the mechanisms must be compatible with the causal logic and evidence base for the theory.

**Model 121**

RoleSelectionMech=OFF;

RoleSocialisationMech=ON;

RoleLoad=((InvolvedxMarital-EmploymentStatus)+(60.9521*((1-ParenthoodStatus)*InvolvedxParenthood)));

RoleIncongruence=(((0.12825+((0.333*DiffExpectancyMarital)+(0.01*DiffExpectancyParenthood)))+(1-(0.333*DiffExpectancyParenthood)))+(0.333*DiffExpectancyEmployment));

RoleStrain=((0.5*RoleIncongruence)+(2.0106*RoleIncongruence));

OutMod=((1-(0.25357*RoleLoad))+(0.001*EmploymentStatus));

InMod=((1-(23.78638*RoleLoad))+((1-(23.78638*RoleLoad))+(2*RoleLoad)));

probFirstDrink=((Disposition*Disposition)*(1+(1.10418*RoleStrain)));

probNextDrink=Disposition;

**Model error:** 0.2092
**Complexity:** 121

**Theoretical credibility:** Violates criterion 2 – Even with no difference in expectancies, an agent still has role incongruence because of the constants in the role incongruence term. Role incongruence is not being used meaningfully.

**Model 79**

RoleSelectionMech=OFF;

RoleSocialisationMech=OFF;

RoleLoad=InvolvedxEmployment;

RoleIncongruence=DiffExpectancyEmployment;

RoleStrain=(RoleLoad+(7*RoleIncongruence));

OutMod=(1-(10*RoleLoad));

InMod=(1-(RoleLoad*ParenthoodStatus));

probFirstDrink=(((ProbOppIn+(0.9*Disposition))*Disposition)*(0.8+(1.10418*RoleStrain)));

probNextDrink=((((0.25*Disposition)+Disposition)*Disposition)*(1+RoleStrain));

**Model error:** 0.2113
**Complexity:** 79

**Theoretical credibility:** Credible.

**Model 60**

RoleSelectionMech=ON;

RoleSocialisationMech=ON;

RoleLoad=InvolvedxEmployment;

RoleIncongruence=(((0.333*DiffExpectancyParenthood)+(0.333*DiffExpectancyParenthood))+(0.333*DiffExpectancyEmployment));

RoleStrain=RoleIncongruence;

OutMod=(1-(1-RoleLoad));

InMod=MaritalStatus;

probFirstDrink=((Disposition*Disposition)*(4+(1.10418*ProbOppIn)));

probNextDrink=Disposition;

**Model error:** 0.2133
**Complexity:** 60

**Theoretical credibility:** Violates criterion 3 – Role theory does not suggest that marriage increases drinking opportunity inside the home.

**Model 59**

RoleSelectionMech=ON;

RoleSocialisationMech=ON;

RoleLoad=InvolvedxMarital;

RoleIncongruence=(((0.333*DiffExpectancyMarital)+(0.333*DiffExpectancyParenthood))+(0.333*DiffExpectancyEmployment));

RoleStrain=RoleIncongruence;

OutMod=MaritalStatus;

InMod=ParenthoodStatus;

probFirstDrink=((Disposition*Disposition)*(4+(RoleStrain-0.01)));

probNextDrink=Disposition;

**Model error:** 0.2138
**Complexity:** 59

**Theoretical credibility:** Credible.

**Model 56**

RoleSelectionMech=OFF;

RoleSocialisationMech=ON;

RoleLoad=InvolvedxParenthood;

RoleIncongruence=(((0.333*DiffExpectancyMarital)+(0.333*DiffExpectancyEmployment))+(1-DiffExpectancyParenthood));

RoleStrain=RoleLoad;

OutMod=MaritalStatus;

InMod=MaritalStatus;

probFirstDrink=((Disposition*Disposition)*(4+(1.10418*ProbOppIn)));

probNextDrink=Disposition;

**Model error:** 0.2144
**Complexity:** 56

**Theoretical credibility:** Violates criterion 2 – Both InMod and OutMod are determined by marital status alone.

**Model 40**

RoleSelectionMech=ON;

RoleSocialisationMech=OFF;

RoleLoad=EmploymentStatus;

RoleIncongruence=DiffExpectancyParenthood;

RoleStrain=RoleLoad;

OutMod=MaritalStatus;

InMod=RoleLoad;

probFirstDrink=((Disposition*Disposition)*(4+(1.10418*ProbOppIn)));

probNextDrink=Disposition;

**Model error:** 0.2287
**Complexity:** 40

**Theoretical credibility:**

- Violates criterion 1 – Role load is being used as a proxy for employment status.
- Violates criterion 2 – Opportunity mechanisms are both determined by only role status.

**Model 39**

RoleSelectionMech=ON;

RoleSocialisationMech=ON;

RoleLoad=InvolvedxEmployment;

RoleIncongruence=(1-DiffExpectancyEmployment);

RoleStrain=RoleIncongruence;

OutMod=RoleLoad;

InMod=EmploymentStatus;

probFirstDrink=((Disposition*Disposition)*(4+ProbOppOut));

probNextDrink=Disposition;

**Model error:** 0.2323
**Complexity:** 39

**Theoretical credibility:** Violate criteria 3 – Role theory does not suggest that employment-driven increases in role load increase drinking opportunities.

**Model 38**

RoleSelectionMech=ON;

RoleSocialisationMech=OFF;

RoleLoad=InvolvedxMarital;

RoleIncongruence=(1-DiffExpectancyEmployment);

RoleStrain=RoleIncongruence;

OutMod=RoleLoad;

InMod=EmploymentStatus;

probFirstDrink=((Disposition*Disposition)*(4+ProbOppIn));

probNextDrink=Disposition;

**Model error:** 0.2360
**Complexity:** 38

**Theoretical credibility:** Credible.

**Model 32**

RoleSelectionMech=OFF;

RoleSocialisationMech=OFF;

RoleLoad=InvolvedxParenthood;

RoleIncongruence=DiffExpectancyMarital;

RoleStrain=(8*RoleIncongruence);

OutMod=MaritalStatus;

InMod=RoleLoad;

probFirstDrink=(Disposition*Disposition);

probNextDrink=Disposition;

**Model error:** 0.6250
**Complexity:** 32

**Theoretical credibility:** Violates criterion 1 – Drinking relies completely on lifetime disposition and the model does not identify any core constructs from the theory.

**Model 31**

RoleSelectionMech=OFF;

RoleSocialisationMech=OFF;

RoleLoad=ParenthoodStatus;

RoleIncongruence=DiffExpectancyParenthood;

RoleStrain=RoleIncongruence;

OutMod=ParenthoodStatus;

InMod=RoleLoad;

probFirstDrink=((RoleStrain-0.01)-0.25357);

probNextDrink=Disposition;

**Model error:** 0.6964
**Complexity:** 31

**Theoretical credibility:**

- Violates criterion 3 – It is not credible that, for the general population, the only people who drink alcohol do so because they experience a threshold level of role incongruence due to non-normative parenting status.

**Model 30**

RoleSelectionMech=ON;

RoleSocialisationMech=OFF;

RoleLoad=InvolvedxEmployment;

RoleIncongruence=DiffExpectancyParenthood;

RoleStrain=RoleIncongruence;

OutMod=ParenthoodStatus;

InMod=RoleLoad;

probFirstDrink=Disposition;

probNextDrink=(Disposition+ProbOppIn);

**Model error:** 0.8184
**Complexity:** 30

**Theoretical credibility:** Violates criterion 3 – Role theory does not suggest that increased role load provides increased drinking opportunities.

**Model 29**

RoleSelectionMech=OFF;

RoleSocialisationMech=OFF;

RoleLoad=InvolvedxMarital;

RoleIncongruence=DiffExpectancyMarital;

RoleStrain=RoleIncongruence;

OutMod=EmploymentStatus;

InMod=RoleLoad;

probFirstDrink=(Disposition*ProbOppIn);

probNextDrink=Disposition;

**Model error:** 0.846
**Complexity:** 29

**Theoretical credibility:** Violates criterion 3 – Role theory does not suggest that role load increases drinking opportunities.

**Model 25**

RoleSelectionMech=ON;

RoleSocialisationMech=OFF;

RoleLoad=InvolvedxEmployment;

RoleIncongruence=DiffExpectancyMarital;

RoleStrain=RoleLoad;

OutMod=RoleLoad;

InMod=RoleLoad;

probFirstDrink=Disposition;

probNextDrink=Disposition;

**Model error:** 0.8465
**Complexity:** 25

**Theoretical credibility:** Violates criterion 1 – Drinking relies completely on lifetime disposition and the model does not identify any core constructs from the theory.

**Model 24**

RoleSelectionMech=OFF;

RoleSocialisationMech=OFF;

RoleLoad=InvolvedxEmployment;

RoleIncongruence=DiffExpectancyMarital;

RoleStrain=RoleLoad;

OutMod=RoleLoad;

InMod=RoleLoad;

probFirstDrink=Disposition;

probNextDrink=Disposition;

**Model error:** 0.8597
**Complexity:** 24

**Theoretical credibility:** Violates criterion 1 – Drinking relies completely on lifetime disposition and the model does not identify any core constructs from the theory.
